# Supplementary material for: Efficient photoreduction of CO 2 to CO by Co-ZIL-L derived NiCo–OH with ultrathin nanosheet assembled 2D leaf superstructure
Source: Royal Society of Chemistry journal article supplement (doi:10.1039/d4ra07416e), 2024-01-01
Supplement: d4ra07416e1.pdf [file d4ra07416e1.pdf]

## Supporting Information

# Efficient Photoreduction of CO<sub>2</sub> to CO by Co-ZIL-L Derived NiCo-OH with Ultrathin Nanosheet Assembled 2D Leaf Superstructure

Yang Zhang,<sup>a</sup> Wenfeng Zhong,<sup>a</sup> Linhai Duan,<sup>b</sup> Jiaping Zhu<sup>a</sup> and Hua Tan<sup>\*, a</sup>

<sup>a</sup> College of Chemistry, Guangdong University of Petrochemical Technology, Maoming  
525000, China

<sup>b</sup> College of Chemical Engineering, Guangdong University of Petrochemical Technology,  
Maoming 525000, China

Corresponding Authors: Hua Tan: [huatan@gdupt.edu.cn](mailto:huatan@gdupt.edu.cn)

**KEYWORDS:** Metal-organic framework; photocatalysis; CO<sub>2</sub> reduction; nanosheet;  
superstructure

### **Photocatalytic experiments.**

The apparent quantum yield (AQY) was measured by the PCX50C Discover multi-channel parallel photocatalytic reaction system (Perfect Light Co., Ltd.) with a 10 W monochromatic LED light as the light source. The number of incident photons was measured by using a radiant power energy meter (PL-MW2000 Photoradiometer, Perfect Light Co., Ltd.). The AQY was calculated according to the following equation:

$$\begin{aligned} \text{AQY(CO)\%} &= \frac{\text{number of reacted electrons}}{\text{number of incident electrons}} \times 100\% \\ &= \frac{\text{number of evolved CO molecules} \times 2}{\text{number of incident electrons}} \times 100\% \end{aligned}$$

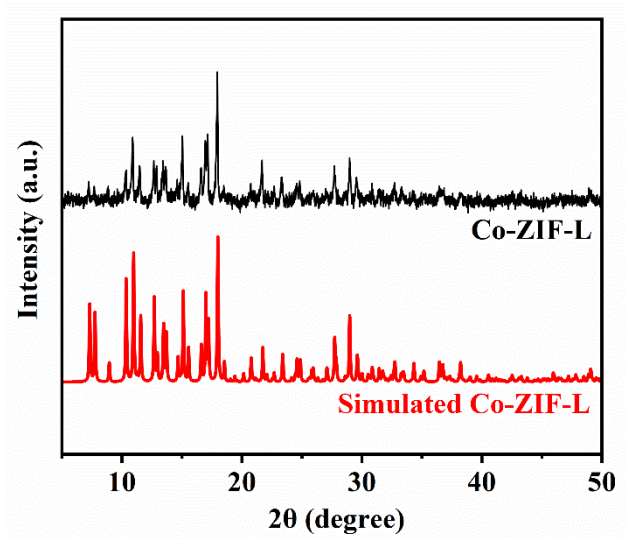

**Fig. S1.** XRD pattern of Co-ZIF-L.

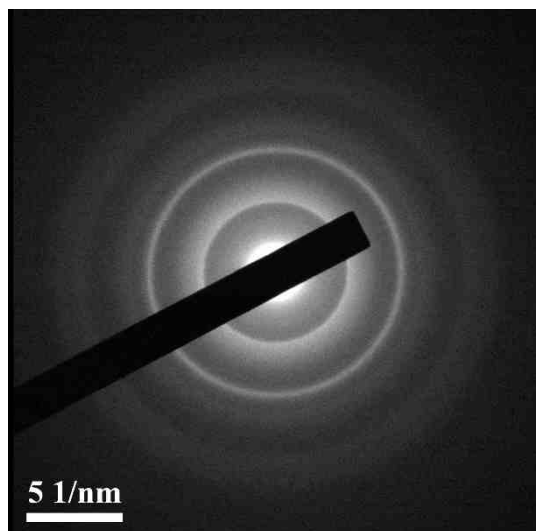

**Fig. S2.** The SAED pattern of NiCo-OH UNLS.

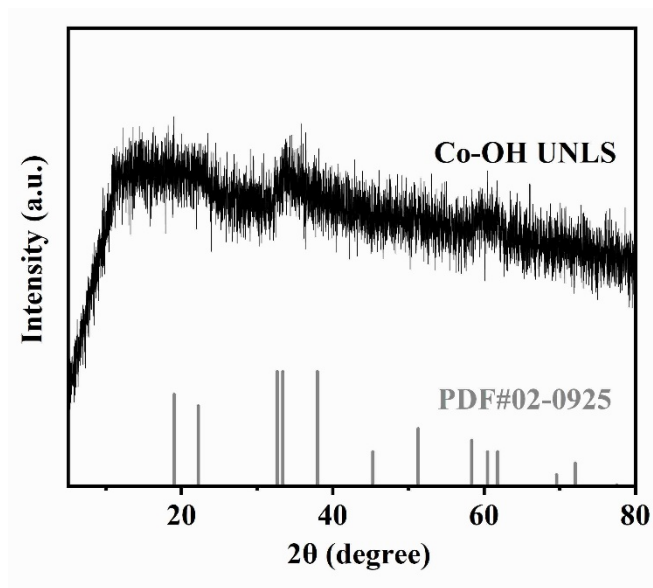

**Fig. S3.** XRD pattern of Co-OH UNLS.

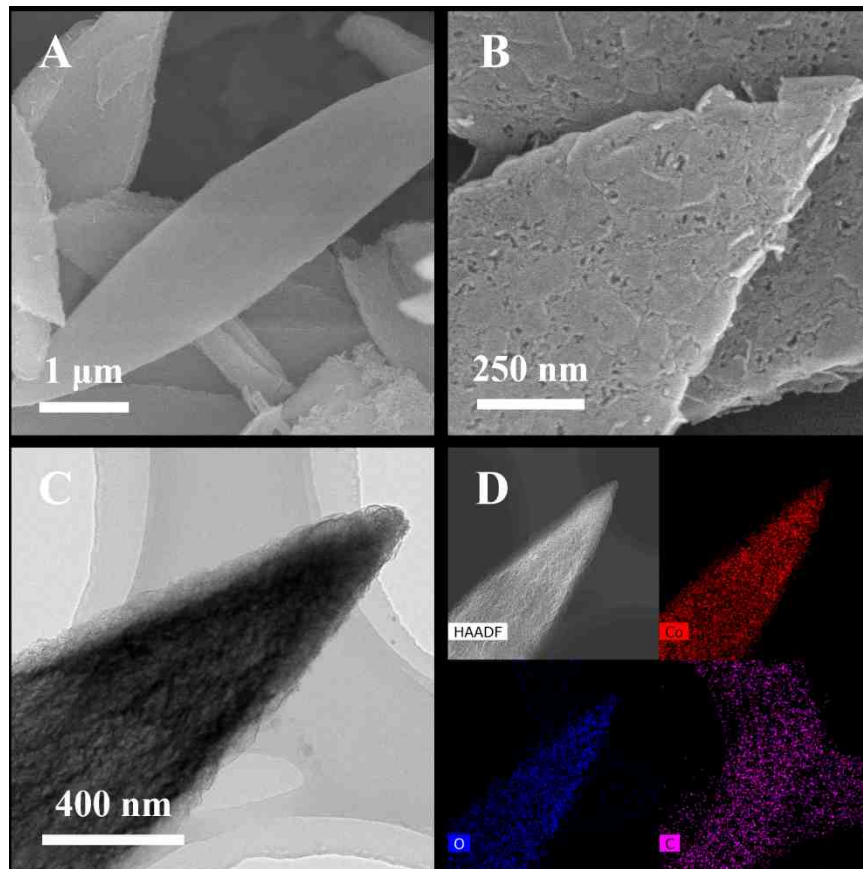

**Fig. S4.** (A and B) SEM images, (C) TEM image and (D) HAADF and EDX elemental mapping images of Co-OH UNLS.

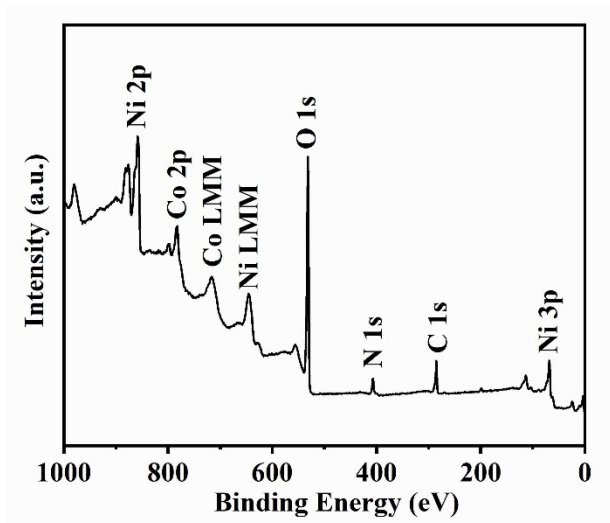

**Fig. S5.** XPS spectrum of NiCo-OH UNLS.

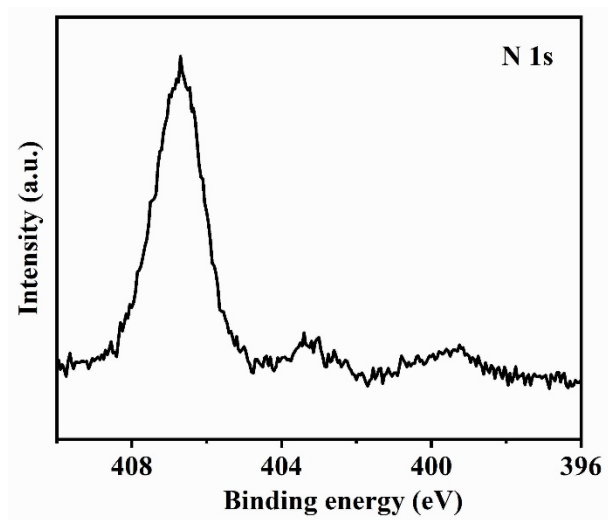

**Fig. S6.** High-resolution XPS spectrum of N 1s of NiCo-OH UNLS.



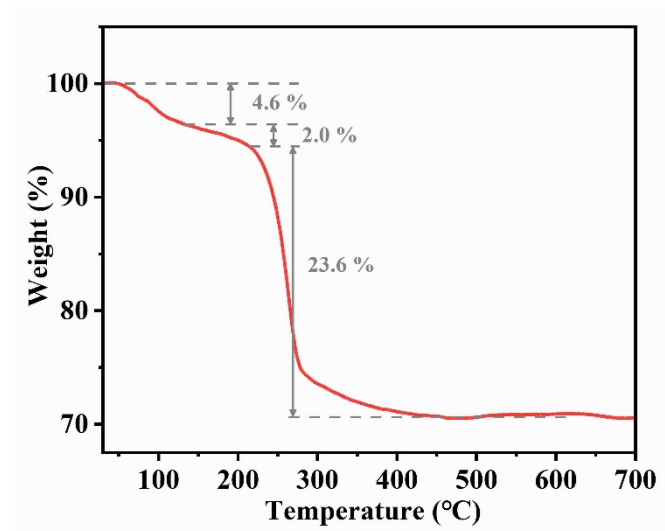

**Fig. S7.** TGA curves of NiCo-OH UNLS under Ar atmosphere.

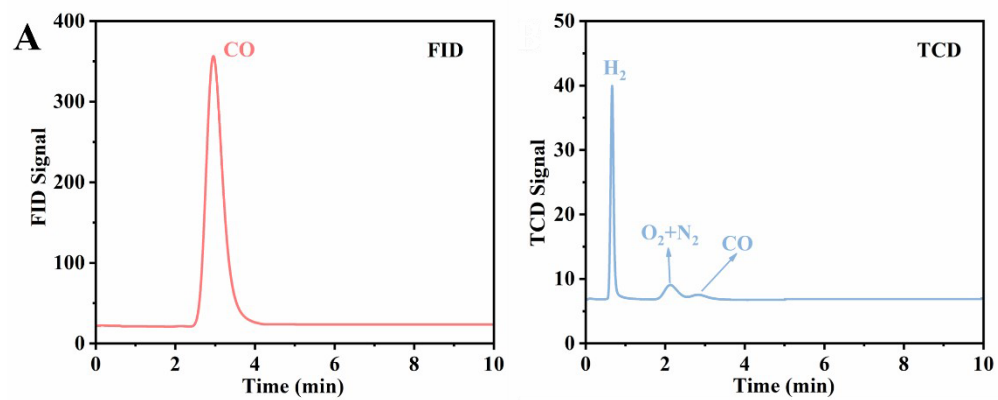

**Fig. S8.** (A) The FID spectrum and (B) the TCD spectrum of the gas products after reaction.

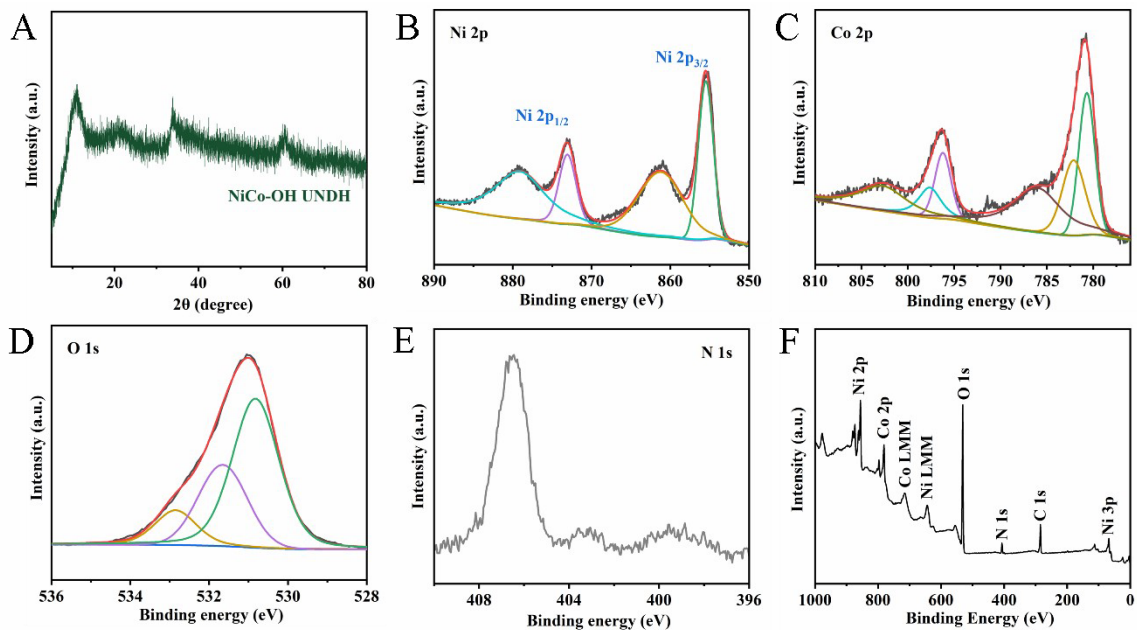

**Fig. S9.** (A) XRD pattern of NiCo-OH UNDH; (B) High-resolution XPS spectrum of (B) Ni 2p, (C) Co 2p, (D) O 1s and (E) O 1s of NiCo-OH UNDH; (F) XPS spectrum of NiCo-OH UNDH.

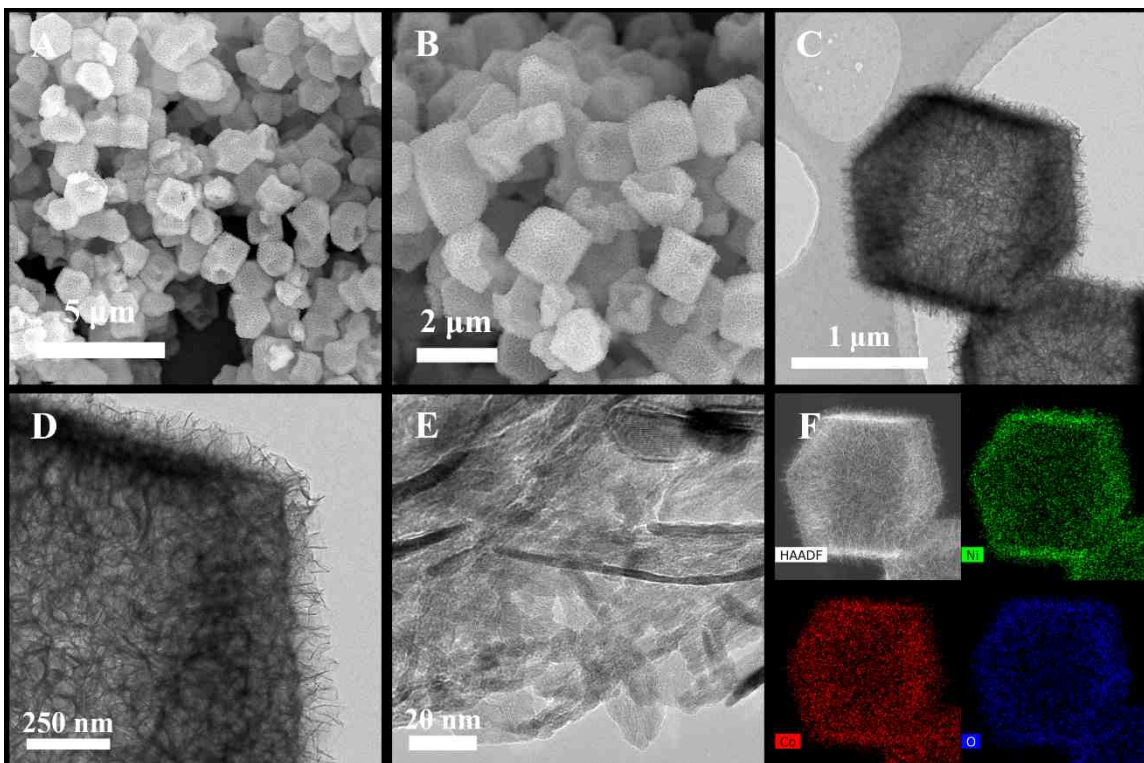

**Fig. S10.** (A and B) SEM, (C and D) TEM, (E) HRTEM, (F) HAADF and EDX elemental mapping images of NiCo-OH UNDH.

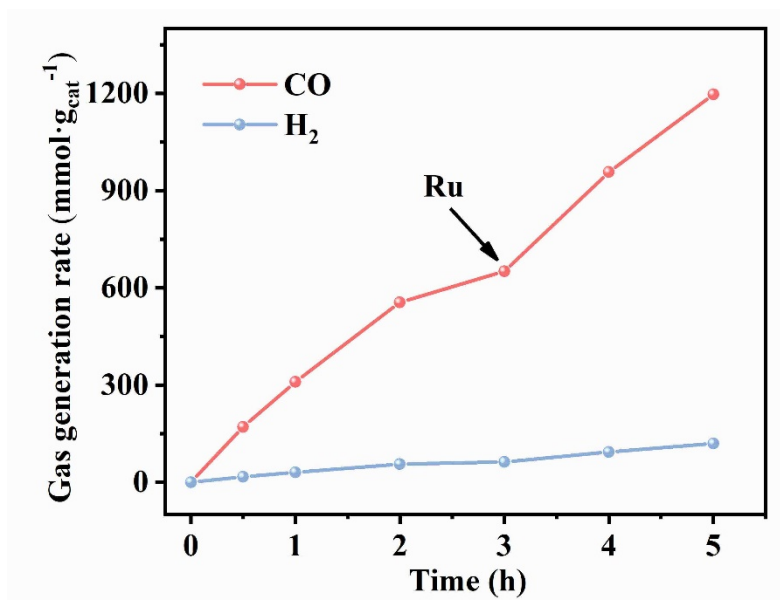

**Fig. S11.** Photocatalytic performance of the replenishment of photosensitizer.

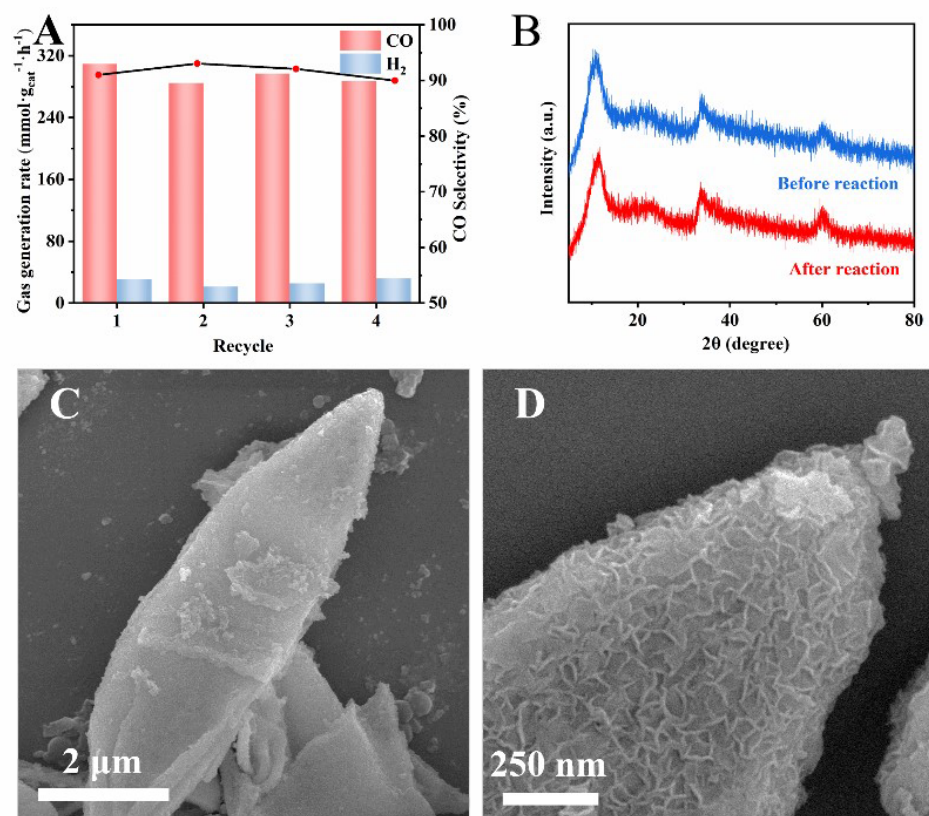

**Fig. S12.** (A) Multicycle photoreduction process over NiCo-OH UNLS; (B) XRD patterns of NiCo-OH UNLS before and after photocatalytic reaction; (C and D) SEM images of NiCo-OH UNLS after photocatalytic reaction.

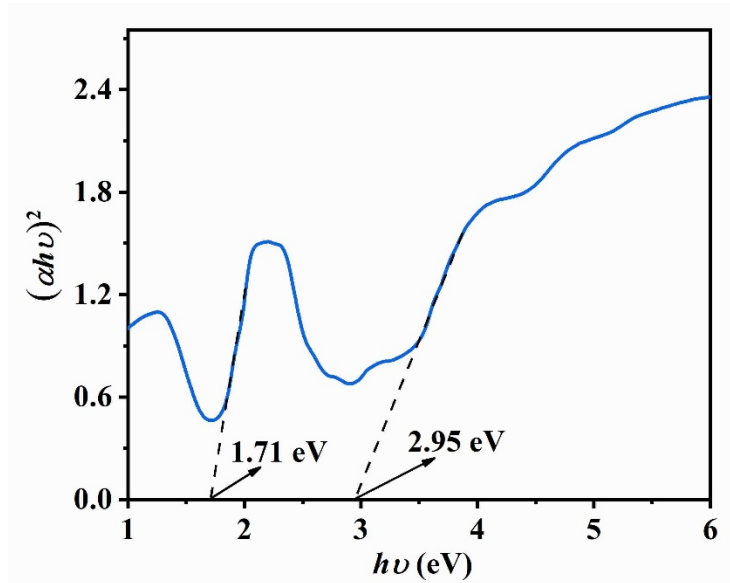

**Fig. S13.** Tauc plots of NiCo-OH UNLS.

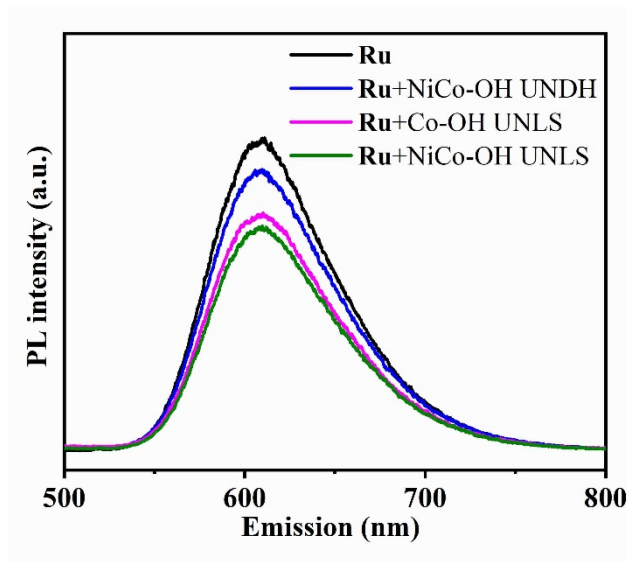

**Fig. S14.** Steady-state PL spectra of various catalysts.



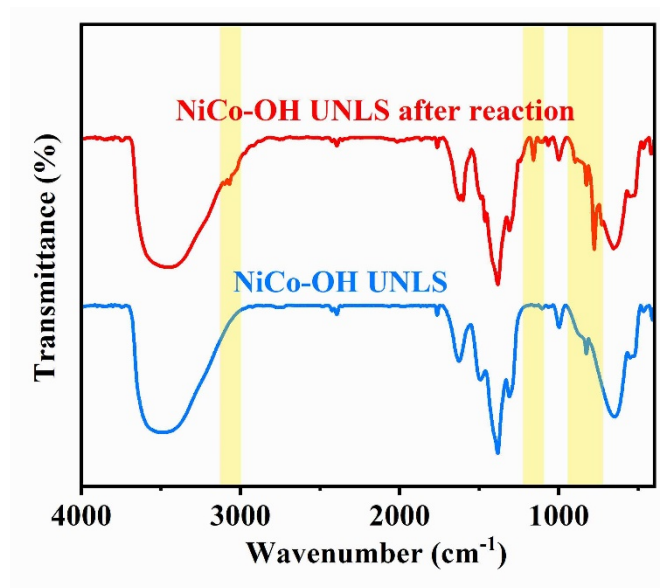

**Fig. S15.** FT-IR spectra of NiCo-OH UNLS before and after photocatalytic reaction.

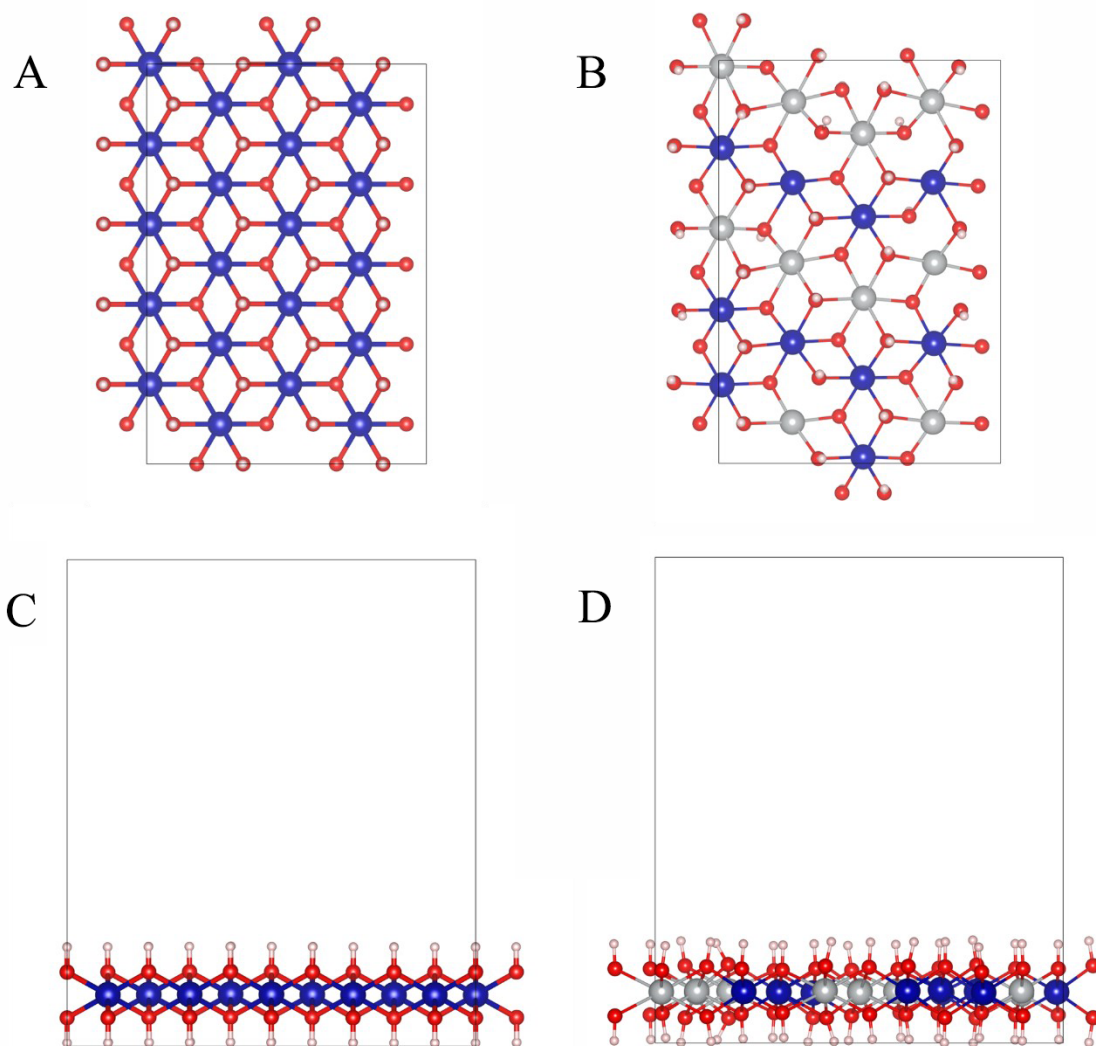

**Fig. S16.** The top view of optimized surface structures of (A) Co-OH UNLS and (B) Ni Co-OH UNLS models; The side view of optimized surface structures of (C) Co-OH UNLS and (D) Ni Co-OH UNLS models. Blue, gray, pink, and red balls represent Co, Ni, H and O atoms, respectively.

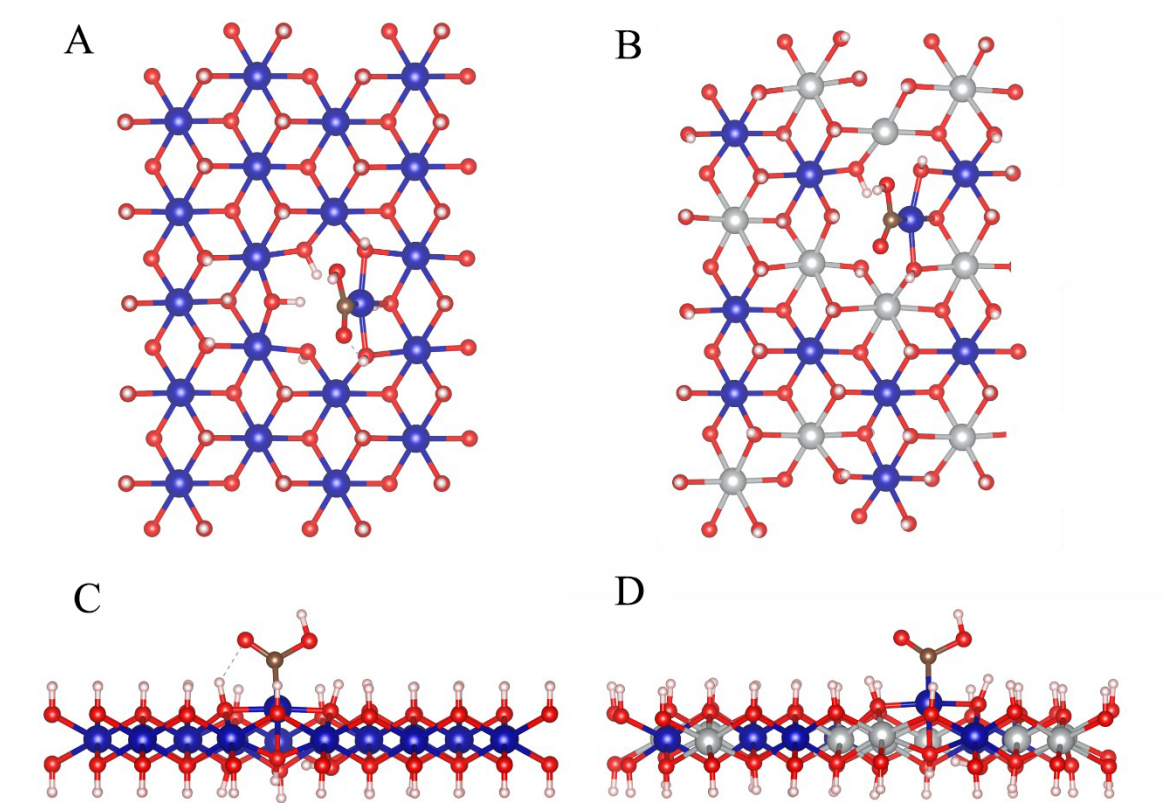

**Fig. S17.** The top view of optimized structures with COOH adsorbed over (A) Co-OH UNLS and (B) Ni Co-OH UNLS; The side view of optimized structures with COOH adsorbed over (C) Co-OH UNLS and (D) Ni Co-OH UNLS.

**Table S1.** Raw data of inductive coupled plasma emission mass spectrometry test.

| Sample          | Mass of catalyst (mg) | Metered volume (mL) | Concentration of Ni (mg L <sup>-1</sup> ) | Concentration of Co (mg L <sup>-1</sup> ) | Molar ratio of Ni : Co |
|-----------------|-----------------------|---------------------|-------------------------------------------|-------------------------------------------|------------------------|
| NiCo-OH<br>UNLS | 5.0                   | 200.0               | 6.8196                                    | 6.3898                                    | 1.07 : 1               |

**Table S2.** Visible-light-driven CO<sub>2</sub> reduction under various conditions.

| Entry            | Catalyst     | Gas products (mmol·g <sup>-1</sup> ·h <sup>-1</sup> ) |                | CO selectivity (%) <sup>[a]</sup> |
|------------------|--------------|-------------------------------------------------------|----------------|-----------------------------------|
|                  |              | CO                                                    | H <sub>2</sub> |                                   |
| 1                | NiCo-OH UNLS | 309.5                                                 | 30.6           | 91.0                              |
| 2                | Co-OH UNDH   | 192.1                                                 | 153.1          | 55.7                              |
| 3                | NiCo-OH UNDH | 170.8                                                 | 20.4           | 89.3                              |
| 4 <sup>[b]</sup> | -            | 12.0                                                  | 2.4            | 83.0                              |
| 5 <sup>[c]</sup> | NiCo-OH UNLS | 0                                                     | 0              | -                                 |
| 6 <sup>[d]</sup> | NiCo-OH UNLS | 0                                                     | 0              | -                                 |
| 7 <sup>[e]</sup> | NiCo-OH UNLS | 0                                                     | 0              | -                                 |
| 8 <sup>[f]</sup> | NiCo-OH UNLS | 0                                                     | 21.3           | 0                                 |

[a] The selectivity of CO was calculated by the equation of  $n(\text{CO})/[n(\text{CO})+n(\text{H}_2)]*100\%$ .

[b] Unit:  $\mu\text{mol}\cdot\text{h}^{-1}$ .

[c] Without TEOA.

[d] Without light.

[e] Without **Ru**.

[f] 1.0 atm Ar instead of 1.0 atm pure CO<sub>2</sub>.

**Table S3.** Summary of photocatalytic CO<sub>2</sub> reduction activities of various photocatalytic systems.

| Catalyst                                                                                 | Light source             | Electron donor<br>Photosensitizer                               | CO evolution<br>(mmol·g <sup>-1</sup> ·h <sup>-1</sup> ) | CO<br>selectivity<br>(%) | Ref.         |
|------------------------------------------------------------------------------------------|--------------------------|-----------------------------------------------------------------|----------------------------------------------------------|--------------------------|--------------|
| NiCo-OH UNLS                                                                             | 36 W 450 nm LED<br>lamp  | TEOA<br>[Ru(bpy) <sub>3</sub> ]Cl <sub>2</sub>                  | 309.5                                                    | 91.0                     | This<br>work |
| Co-OH UNDH                                                                               | 36 W 450 nm LED<br>lamp  | TEOA<br>[Ru(bpy) <sub>3</sub> ]Cl <sub>2</sub>                  | 192.1                                                    | 55.7                     | This<br>work |
| NiCo-OH<br>UNDH                                                                          | 36 W 450 nm LED<br>lamp  | TEOA<br>[Ru(bpy) <sub>3</sub> ]Cl <sub>2</sub>                  | 170.8                                                    | 89.3                     | This<br>work |
| Cu <sub>2</sub> S@R <sub>OH</sub> <sup>-</sup><br>NiCo <sub>2</sub> O <sub>3</sub> DSNBs | 300 W Xe lamp            | TEOA<br>[Ru(bpy) <sub>3</sub> ]Cl <sub>2</sub>                  | 7.1                                                      | 72.0                     | 1            |
| NC@NiCo <sub>2</sub> O <sub>4</sub>                                                      | 300 W Xe lamp            | TEOA<br>[Ru(bpy) <sub>3</sub> ]Cl <sub>2</sub>                  | 26.2                                                     | 88.6                     | 2            |
| Ni-Co <sub>3</sub> O <sub>4</sub><br>NSDHN                                               | 300 W Xe lamp            | Ru(bpy) <sub>3</sub> Cl <sub>2</sub> ·6H <sub>2</sub> O<br>TEOA | 277.7                                                    | 92.0                     | 3            |
| Ni(OH) <sub>2</sub> -<br>10%GR                                                           | 300 W Xe lamp            | Ru(bpy) <sub>3</sub> Cl <sub>2</sub> ·6H <sub>2</sub> O<br>TEOA | 10.7                                                     | 96                       | 4            |
| ZnCo-OH<br>QUNH                                                                          | 300 W Xe lamp            | Ru(bpy) <sub>3</sub> Cl <sub>2</sub> ·6H <sub>2</sub> O<br>TEOA | 671.3                                                    | 76.9                     | 5            |
| UiO-Co-N <sub>3</sub>                                                                    | 300 W Xe lamp            | Ru(bpy) <sub>3</sub> Cl <sub>2</sub> ·6H <sub>2</sub> O<br>BIH  | 0.179                                                    | 99.3                     | 6            |
| NiCoOP-<br>NPs@MHCFs                                                                     | 300 W Xe lamp            | Ru(bpy) <sub>3</sub> Cl <sub>2</sub> ·6H <sub>2</sub> O<br>TEOA | 166                                                      | 65.9                     | 7            |
| Ni(OH) <sub>2</sub> -NC-2                                                                | 100 W 420 nm<br>LED lamp | Ru(bpy) <sub>3</sub> Cl <sub>2</sub> ·6H <sub>2</sub> O<br>TEOA | 144                                                      | 96.1                     | 8            |

## Reference

1. L. Li, X. Dai, D. Chen, Y. Zeng, Y. Hu and X. W. D. Lou, *Angew. Chem. Int. Ed.*, 2022, 61, e202205839.
2. S. Wang, B. Guan and X. Lou, *Energy Environ. Sci.*, 2018, 11, 306-310.
3. G. Qian, W. Lyu, X. Zhao, J. Zhou, R. Fang, F. Wang and Y. Li, *Angew. Chem. Int. Ed.*, 2022, 61, e202210576.
4. K. Lu, Y. Li, F. Zhang, M. Qi, X. Chen, Z. Tang, Y. M. A. Yamada, M. Anpo, M. Conte and Y. Xu, *Nat. Commun.*, 2020, 11, 5181.
5. F. Wang, R. Fang, X. Zhao, X. Kong, T. Hou, K. Shen and Y. Li, *ACS Nano*, 2022, 16, 4517-4527.
6. J. Wang, K. Sun, D. Wang, X. Niu, Z. Lin, S. Wang, W. Yang, J. Huang and H. Jiang, *ACS Catal.*, 2023, 13, 8760-8769.
7. Y. Wang, S. Wang and X. Lou, *Angew. Chem. Int. Ed.*, 2019, 58, 17236-17240.
8. Y. Su, Z. Song, W. Zhu, Q. Mu, X. Yuan, Y. Lian, H. Cheng, Z. Deng, M. Chen, W. Yin and Y. Peng, *ACS Catal.*, 2020, 11, 345-354.
